# Supplementary material for: Protective Effect of Chokeberry (Aronia melanocarpa L.) Extract against Cadmium Impact on the Biomechanical Properties of the Femur: A Study in a Rat Model of Low and Moderate Lifetime Women Exposure to This Heavy Metal
Source: MDPI journal article supplement (doi:10.3390/nu9060543), 2017-05-25
Supplement: s1 [file s1]

## **Supplementary Materials**

### **Protective Effect of Chokeberry (*Aronia melanocarpa* L.) Extract Against Cadmium Impact on the Biomechanical Properties of the Femur: a Study in a Rat Model of Low and Moderate Lifetime Women Exposure to this Heavy Metal**

**Małgorzata M. Brzóska\*, Alicja Roszczenko, Joanna Rogalska, Małgorzata Galażyn-Sidorczuk, Magdalena Mężyńska**

Department of Toxicology, Medical University of Białystok, Adama Mickiewicza 2C street, 15-222 Białystok, Poland

\* Correspondence: [malgorzata.brzoska@umb.edu.pl](mailto:malgorzata.brzoska@umb.edu.pl); Tel.: +48 85 748 56 04; Fax: +48 85 748 58 34

**Table S1.** Effect of a polyphenol-rich extract from the berries of *Aronia melanocarpa* (AE) on bone turnover in rats exposed to cadmium (Cd). <sup>1</sup>

| Marker<br>of bone<br>turnover               | Experiment<br>duration<br>(months) | Exposure to 1 mg Cd/kg diet |                      |                 | Exposure to 5 mg Cd/kg diet |                      |                 |
|---------------------------------------------|------------------------------------|-----------------------------|----------------------|-----------------|-----------------------------|----------------------|-----------------|
|                                             |                                    | Effect of<br>Cd alone       | Cd + AE              |                 | Effect of<br>Cd alone       | Cd + AE              |                 |
|                                             |                                    |                             | Effect of<br>Cd + AE | Effect<br>of AE |                             | Effect of<br>Cd + AE | Effect<br>of AE |
| Serum                                       |                                    |                             |                      |                 |                             |                      |                 |
| OC                                          | 3                                  | ↔                           | ↔                    | ↔               | ↔                           | ↔                    | ↔               |
|                                             | 10                                 | ↓ 46%                       | ↔                    | ↗ 2.2-fold      | ↓ 34%                       | ↔                    | ↗ 1.9-fold      |
|                                             | 17                                 | ↓ 48%                       | ↔                    | ↗ 98%           | ↓ 45%                       | ↔                    | ↗ 68%           |
|                                             | 24                                 | ↔                           | ↔                    | ↔               | ↔                           | ↑ 51%                | ↗ 76%           |
| CTX                                         | 3                                  | ↔                           | ↔                    | ↔               | ↔                           | ↔                    | ↔               |
|                                             | 10                                 | ↔                           | ↔                    | ↘ 20%           | ↑ 23%                       | ↔                    | ↘ 15%           |
|                                             | 17                                 | ↔                           | ↔                    | ↔               | ↑ 21%                       | ↓ 33%                | ↘ 45%           |
|                                             | 24                                 | ↑ 47%                       | ↑ 34%                | ↔               | ↑ 2.1-fold                  | ↑ 42%                | ↘ 32%           |
| Bone tissue at the distal femoral epiphysis |                                    |                             |                      |                 |                             |                      |                 |
| ALP                                         | 3                                  | ↔                           | ↔                    | ↔               | ↔                           | ↔                    | ↔               |
|                                             | 10                                 | ↓ 27%                       | ↓ 28%                | ↔               | ↓ 27%                       | ↔                    | ↗ 52%           |
|                                             | 17                                 | ↓ 36%                       | ↔                    | ↗ 52%           | ↓ 42%                       | ↓ 27%                | ↗ 26%           |
|                                             | 24                                 | ↓ 25%                       | ↑ 23%                | ↗ 65%           | ↓ 23%                       | ↑ 45%                | ↗ 87%           |
| OPG                                         | 3                                  | ↔                           | ↔                    | ↔               | ↔                           | ↔                    | ↔               |
|                                             | 10                                 | ↓ 40%                       | ↔                    | ↔               | ↓ 54%                       | ↓ 32%                | ↗ 50%           |
|                                             | 17                                 | ↓ 51%                       | ↑ 37%                | ↗ 2.8-fold      | ↓ 80%                       | ↓ 32%                | ↗ 3.5-fold      |
|                                             | 24                                 | ↓ 12%                       | ↑ 75%                | ↗ 2-fold        | ↓ 67%                       | ↑ 2.3-fold           | ↗ 6.9-fold      |
| sRANKL                                      | 3                                  | ↑ 2.3-fold                  | ↑ 2.2-fold           | ↔               | ↑ 2.4-fold                  | ↑ 2.4-fold           | ↔               |
|                                             | 10                                 | ↑ 2-fold                    | ↑ 2-fold             | ↔               | ↑ 87%                       | ↑ 74                 | ↔               |
|                                             | 17                                 | ↑ 69%                       | ↔                    | ↘ 56%           | ↑ 39%                       | ↓ 36%                | ↘ 54%           |
|                                             | 24                                 | ↑ 2.5-fold                  | ↔                    | ↘ 70%           | ↑ 34%                       | ↔                    | ↘ 39%           |
| sRANKL/OPG                                  | 3                                  | ↑ 2.7-fold                  | ↑ 2.5-fold           | ↔               | ↑ 2.5-fold                  | ↑ 2.6-fold           | ↔               |
|                                             | 10                                 | ↑ 5-fold                    | ↔                    | ↔               | ↑ 5.6-fold                  | ↔                    | ↘ 58%           |
|                                             | 17                                 | ↑ 3.5-fold                  |                      | ↘ 84%           | ↑ 7.3-fold                  | ↔                    | ↘ 87%           |
|                                             | 24                                 | ↑ 2.7-fold                  | ↓ 60%                | ↘ 85%           | ↑ 4.1-fold                  | ↓ 64%                | ↘ 91%           |

<sup>1</sup> Detailed data on the impact of AE on bone turnover in rats exposed to Cd have already been reported [26]. In this table only changes ( $p < 0.05$ ) compared to the control group: a percentage or factor of increase ( $\uparrow$ ) or decrease ( $\downarrow$ ), and the respective group that received Cd alone: a percentage of decrease ( $\searrow$ ) or increase ( $\nearrow$ ), are indicated.  $\leftrightarrow$  and  $\longleftrightarrow$  without statistically significant ( $p > 0.05$ ) change compared to the control and respective group treated with Cd alone, respectively. OC, osteocalcin; CTX, carboxy-terminal cross-linking telopeptides of type I collagen; ALP, alkaline phosphatase; OPG, osteoprotegerin; sRANKL, soluble receptor activator of nuclear factor- $\kappa$ B ligand; sRANKL/OPG, the ratio of sRANKL and OPG.

**Table S2.** Effect of a polyphenol-rich extract from the berries of *Aronia melanocarpa* (AE) on the femur bone mineral density (BMD) in rats exposed to cadmium (Cd). <sup>2</sup>

| Experiment duration (months) | Exposure to 1 mg Cd/kg diet |                   |              | Exposure to 5 mg Cd/kg diet |                   |              |
|------------------------------|-----------------------------|-------------------|--------------|-----------------------------|-------------------|--------------|
|                              | Effect of Cd alone          | Cd + AE           |              | Effect of Cd alone          | Cd + AE           |              |
|                              |                             | Effect of Cd + AE | Effect of AE |                             | Effect of Cd + AE | Effect of AE |
| 3                            | ↔                           | ↑ 11%             | ↔            | ↔                           | ↔                 | ↔            |
| 10                           | ↓ 18%                       | ↔                 | ↗ 14%        | ↓ 20%                       | ↓ 12%             | ↗ 10%        |
| 17                           | ↓ 22%                       | ↔                 | ↗ 21%        | ↓ 19%                       | ↓ 8%              | ↗ 13%        |
| 24                           | ↓ 22%                       | ↔                 | ↗ 26%        | ↓ 23%                       | ↔                 | ↗ 32%        |

<sup>2</sup> Detailed data on the impact of the AE on BMD of the femur in rats exposed to Cd have already been reported [26]. In this table only changes ( $p < 0.05$ ) compared to the control group: a percentage of decrease (↓), and the respective group that received Cd alone: a percentage of increase (↗), are indicated. ↔ and ↔ without statistically significant ( $p > 0.05$ ) change compared to the control and respective group treated with Cd alone, respectively.

**Table S3.** Polyphenolic compounds concentration in the extract from the berries of *Aronia melanocarpa*.<sup>3, 4</sup>

| Compound                   | Concentration (mg/g) |
|----------------------------|----------------------|
| Total polyphenols          | 612.40 ± 3.33        |
| Total anthocyanins         | 202.28 ± 1.28        |
| Total proanthocyanidins    | 129.87 ± 1.12        |
| Total phenolic acids       | 110.92 ± 0.89        |
| Total flavonoids           | 21.94 ± 0.98         |
| Chlorogenic acid           | 68.32 ± 0.08         |
| Cyanidin 3-O-β-galactoside | 80.07 ± 1.05         |
| Cyanidin 3-O-α-arabinoside | 33.21 ± 0.01         |
| Cyanidin 3-O-β-glucoside   | 3.68 ± 0.01          |

<sup>3</sup> Total polyphenols, total phenolic acids, flavonoids, proanthocyanidins and anthocyanins concentrations in the aronia extract by Adamed Consumer Healthcare were determined spectrophotometrically [26]. Polyphenolic profile of the extract and quantification of chlorogenic acid and anthocyanins (cyanidin 3-O-β-galactoside, cyanidin 3-O-α-arabinoside, cyanidin 3-O-β-glucoside) were carried out by Ultra Performance Liquid Chromatography method [26].

Data are represented as mean ± SE (n = 3).

<sup>4</sup> The polyphenolic profile of *A. melanocarpa* berries is well-known [22,23,31,32]. Anthocyanins, proanthocyanidins (oligomeric and polymeric catechins), flavonols (glycoside derivatives of quercetin) as well as hydroxycinnamic acids (chlorogenic and neochlorogenic acids) are present in the extract from the berries of *A. melanocarpa*. The anthocyanin profile of the extract consists almost exclusively of cyanidin glycosides, namely cyanidin 3-arabinoside, cyanidin 3-galactoside, cyanidin 3-glucoside, and cyanidin 3-xyloside (the first two are predominant), and relatively low amounts of pelargonidin 3-arabinoside and pelargonidin 3-galactoside. Flavonols are the minor class of polyphenols in chokeberries. Quercetin, kaempferol and several quercetin mono- and diglycosides (quercetin 3-galactoside, quercetin 3-glucoside, quercetin 3-rutinoside, quercetin 3-vicianoside, and quercetin 3-robinobioside) are also detected in aronia berries, but in relatively low concentrations. Chokeberry proanthocyanidins consist exclusively of (-)-epicatechin units bonded by a C4 to C8 linkage. The hydroxycinnamic acids are represented by significant amounts of chlorogenic and neochlorogenic acids [23,31,32].

**Table S4.** Cadmium (Cd) intake in particular experimental groups. <sup>5</sup>

| Group                | Cd intake (µg/kg, b.w.) |                  |                  |                  |
|----------------------|-------------------------|------------------|------------------|------------------|
|                      | 3 months                | 10 months        | 17 months        | 24 months        |
| Control              | 4.709 ± 0.067           | 2.716 ± 0.060    | 2.582 ± 0.047    | 2.597 ± 0.051    |
| AE                   | 4.615 ± 0.065           | 2.935 ± 0.063    | 2.410 ± 0.046    | 2.764 ± 0.059    |
| Cd <sub>1</sub>      | 77.50 ± 1.264***        | 43.85 ± 0.60***  | 43.41 ± 0.64***  | 43.22 ± 0.85***  |
| Cd <sub>1</sub> + AE | 80.93 ± 1.06***         | 46.90 ± 0.84***  | 40.15 ± 0.77***  | 48.12 ± 0.94***  |
| Cd <sub>5</sub>      | 383.65 ± 4.44***        | 235.78 ± 2.55*** | 214.54 ± 2.83*** | 253.75 ± 8.63*** |
| Cd <sub>5</sub> + AE | 385.92 ± 4.91***        | 239.66 ± 1.43*** | 208.75 ± 3.04*** | 252.06 ± 9.29*** |

<sup>5</sup> Cd intake in the control group and the group receiving 0.1% aqueous extract from the berries of *A. melanocarpa* (AE group) was calculated based on this metal concentration determined by us in the standard diet (0.0584 mg/kg), while this element intake in the groups exposed to Cd was calculated based on its concentration in the feed declared by the manufacturer (1 or 5 mg Cd/kg) [25,26].

Data are represented as mean ± SE for eight rats (except for seven animals in the AE, Cd<sub>1</sub> and Cd<sub>5</sub> groups after 24 months). Statistically significant differences (Anova, Duncan's multiple range test) compared to the control group (\*\*\*)  $p < 0.001$  are marked.

**Table S5.** The intake of polyphenolic compounds from the extract from *Aronia melanocarpa* berries (AE) in particular experimental groups. <sup>6</sup>

| Group                | AE intake (mg/kg b.w.) |              |              |              |
|----------------------|------------------------|--------------|--------------|--------------|
|                      | 3 months               | 10 months    | 17 months    | 24 months    |
| AE                   | 91.53 ± 1.12           | 62.29 ± 1.87 | 53.22 ± 1.14 | 47.96 ± 1.56 |
| Cd <sub>1</sub> + AE | 97.47 ± 1.45           | 60.92 ± 1.07 | 55.00 ± 0.76 | 49.26 ± 1.57 |
| Cd <sub>5</sub> + AE | 92.41 ± 1.30           | 65.14 ± 1.77 | 56.02 ± 1.15 | 48.26 ± 2.07 |

<sup>6</sup> Polyphenols intake was calculated assuming that the AE contained 65.74% of these compounds (manufacturer data). The intake of polyphenols in the control group, Cd<sub>1</sub> group, and Cd<sub>5</sub> group was recognized to be 0 [25,26]. Data are represented as mean ± SE for eight rats (except for seven animals in the AE group after 24 months). There were no statistically significant differences ( $p > 0.05$ ; Anova, Duncan's multiple range test) between the experimental groups.

**Table S6.** Effect of the extract from the berries of *Aronia melanocarpa* (AE) on the absolute and relative femur weight of cadmium (Cd)-exposed rats.

| Group                                 | Experiment duration |                |                |                |
|---------------------------------------|---------------------|----------------|----------------|----------------|
|                                       | 3 months            | 10 months      | 17 months      | 24 months      |
| <b>Absolute weight (g)</b>            |                     |                |                |                |
| Control                               | 0.6098 ± 0.014      | 0.6656 ± 0.020 | 0.7383 ± 0.020 | 0.7703 ± 0.013 |
| AE                                    | 0.6146 ± 0.023      | 0.6679 ± 0.039 | 0.7823 ± 0.033 | 0.8136 ± 0.013 |
| Cd <sub>1</sub>                       | 0.5898 ± 0.017      | 0.6659 ± 0.013 | 0.7328 ± 0.015 | 0.7687 ± 0.018 |
| Cd <sub>1</sub> + AE                  | 0.5757 ± 0.014      | 0.6935 ± 0.023 | 0.7607 ± 0.016 | 0.8006 ± 0.018 |
| Cd <sub>5</sub>                       | 0.5773 ± 0.016      | 0.6693 ± 0.014 | 0.7325 ± 0.033 | 0.7675 ± 0.016 |
| Cd <sub>5</sub> + AE                  | 0.6047 ± 0.018      | 0.6847 ± 0.019 | 0.7635 ± 0.019 | 0.8074 ± 0.012 |
| <b>Relative weight (g/100 g b.w.)</b> |                     |                |                |                |
| Control                               | 0.2006 ± 0.005      | 0.1541 ± 0.005 | 0.1459 ± 0.004 | 0.1306 ± 0.002 |
| AE                                    | 0.198 9 ± 0.008     | 0.1546 ± 0.009 | 0.1513 ± 0.006 | 0.1384 ± 0.002 |
| Cd <sub>1</sub>                       | 0.1993 ± 0.006      | 0.1454 ± 0.003 | 0.1514 ± 0.003 | 0.1266 ± 0.003 |
| Cd <sub>1</sub> + AE                  | 0.1925 ± 0.005      | 0.1562 ± 0.006 | 0.1509 ± 0.003 | 0.1348 ± 0.003 |
| Cd <sub>5</sub>                       | 0.1833 ± 0.005      | 0.1511 ± 0.003 | 0.1517 ± 0.008 | 0.1342 ± 0.003 |
| Cd <sub>5</sub> + AE                  | 0.1914 ± 0.006      | 0.1634 ± 0.005 | 0.1536 ± 0.004 | 0.1360 ± 0.003 |

Data are represented as mean ± SE for eight rats (except for seven animals in the AE, Cd<sub>1</sub> and Cd<sub>5</sub> groups after 24 months).

There were no statistically significant differences ( $p > 0.05$ ; ANOVA, Duncan's multiple range test) between the experimental groups.



**Table S7.** Effect of the extract from the berries of *Aronia melanocarpa* (AE) on the femur length and diameter at the mid-diaphysis in rats exposed to cadmium (Cd).

| Group                    | Experiment duration |               |                             |               |
|--------------------------|---------------------|---------------|-----------------------------|---------------|
|                          | 3 months            | 10 months     | 17 months                   | 24 months     |
| <b>Femur length (mm)</b> |                     |               |                             |               |
| Control                  | 31.30 ± 0.42        | 32.34 ± 0.48  | 31.54 ± 0.43                | 32.69 ± 0.29  |
| AE                       | 31.12 ± 0.29        | 32.30 ± 0.46  | 32.17 ± 0.66                | 33.18 ± 0.40  |
| Cd <sub>1</sub>          | 32.55 ± 1.40        | 32.96 ± 0.48  | 31.20 ± 0.30                | 32.30 ± 0.16  |
| Cd <sub>1</sub> + AE     | 30.91 ± 0.18        | 32.62 ± 0.38  | 32.29 ± 0.24                | 32.83 ± 0.36  |
| Cd <sub>5</sub>          | 31.55 ± 0.45        | 33.03 ± 0.33  | 31.28 ± 0.32                | 33.40 ± 0.48  |
| Cd <sub>5</sub> + AE     | 31.04 ± 0.48        | 31.78 ± 0.41  | 31.08 ± 0.24                | 33.69 ± 0.54  |
| <b>M – L with (mm)</b>   |                     |               |                             |               |
| Control                  | 4.130 ± 0.057       | 4.219 ± 0.052 | 4.480 ± 0.086               | 4.618 ± 0.078 |
| AE                       | 4.096 ± 0.111       | 4.306 ± 0.099 | 4.565 ± 0.471               | 4.461 ± 0.066 |
| Cd <sub>1</sub>          | 3.949 ± 0.096       | 4.383 ± 0.097 | 4.526 ± 0.053               | 4.754 ± 0.057 |
| Cd <sub>1</sub> + AE     | 3.990 ± 0.162       | 4.313 ± 0.117 | 4.546 ± 0.082               | 4.703 ± 0.045 |
| Cd <sub>5</sub>          | 4.151 ± 0.072       | 4.306 ± 0.085 | 4.351 ± 0.168               | 4.566 ± 0.042 |
| Cd <sub>5</sub> + AE     | 4.063 ± 0.091       | 4.200 ± 0.135 | 4.388 ± 0.076               | 4.545 ± 0.095 |
| <b>A – P with (mm)</b>   |                     |               |                             |               |
| Control                  | 2.791 ± 0.066       | 2.760 ± 0.084 | 3.153 ± 0.067               | 3.370 ± 0.170 |
| AE                       | 2.943 ± 0.079       | 2.906 ± 0.113 | 3.309 ± 0.070               | 3.351 ± 0.018 |
| Cd <sub>1</sub>          | 2.795 ± 0.042       | 2.946 ± 0.035 | 3.213 ± 0.091               | 3.574 ± 0.074 |
| Cd <sub>1</sub> + AE     | 2.813 ± 0.057       | 2.983 ± 0.061 | 3.345 ± 0.059               | 3.540 ± 0.044 |
| Cd <sub>5</sub>          | 2.900 ± 0.049       | 2.988 ± 0.032 | 2.961 ± 0.090               | 3.521 ± 0.077 |
| Cd <sub>5</sub> + AE     | 2.758 ± 0.055       | 2.788 ± 0.073 | 2.998 ± 0.105 <sup>‡‡</sup> | 3.326 ± 0.089 |

Data are represented as mean ± SE for eight rats (except for seven animals in the AE, Cd<sub>1</sub> and Cd<sub>5</sub> groups after 24 months).

<sup>‡‡</sup>  $p < 0.01$  vs respective Cd<sub>1</sub> + AE group (ANOVA, Duncan's multiple range test).
